# Supplementary material for: CD73 immune checkpoint defines regulatory NK cells within the tumor microenvironment
Source: JCI journal article supplement (doi:10.1172/jci128895), 2019-11-26
Supplement: sd4 [file 4]

## Sheet: Sheet1
Antigen	Conjugation	Clone	Company	Catalog number	Panel(s)
AQUA LIVE/DEAD			Thermo Scientific	L34957	Cell Sorting, NK phenotyping in PBMC,exocytosis
CD107a	PerCP-Cy5.5	H4A3	Biolegend	328615	Exocytosis
CD3	PerCP-Cy5.5	UCHT1	Biolegend	300430	Stromal NK In tumor, NK phenotyping in PBMC
CD45	BV650	HI30	Biolegend	304043	Cell Sorting, Stromal NK in tumor
CD56	PE-Cy7	HCD56	Biolegend	318317	tumor co-culture
CD56	BV570	HCD56	Biolegend	318329	Stromal NK in tumor
CD63	FITC	MEM-259	Immune tools	21270631	Exocytosis
CD73	PE	AD2	Biolegend	344003	Stromal NK in tumor
CD73	Pacific Blue	AD2	Biolegend	344011	Stromal NK In tumor
CD73	APC-Cy7	AD2	Biolegend	344021	Cell Sorting
CD8a	PerCP-Cy5.5	RPA-T8	Biolegend	301032	Stromal NK In tumor
Cell Trace Violet			Thermo Scientific	C34557	Suppression Assay
CFSE			Biolegend	423801	Suppression Assay
IFNγ	APC	B27	Biolegend	506510	Suppression Assay
IL-10	PE	JES3-9D7	Biolegend	501403	IL10 and TGF-β production
LAG-3	Alexa Fluor-488	11c3c65	Biolegend	369325	Stromal NK In tumor and PBMC
Near-IR LIVE/DEAD			Thermo Scientific	L10119	Suppression Assay, Stromal NK in tumor
NKG2C	Alexa Fluor-488	134591	R&D Systems	fab138g	Stromal NK in tumor
NKG2D	PE-CF594	1D11	BD biosciences	562498	Stromal NK In tumor and PBMC
NKp44	PE	p44-8 1	BD biosciences	558563	Stromal NK in tumor
NKp46	PE-Cy7	900	BD biosciences	562101	Stromal NK in tumor
PD1	APC	MIH4	Thermo Scientific	17-9969-41	Stromal NK In tumor and PBMC
PD-L1	BV785	29E.2A3	Biolegend	329735	Stromal NK In tumor
PD-L1	PE-Cy7	MIH1	BD biosciences	558017	Stromal NK In tumor and PBMC
TGF-β	PE	1D11	R&D Systems	IC1835P	IL10 and TGF-β production
TIGIT	APC	MBSA43	Thermo Scientific	17950042	Stromal NK in tumor
TIM-3	BV785	F38-2E2	Biolegend	345032	Stromal NK In tumor and PBMC
TNFα	BV785	mab11	Biolegend	502947	Suppression Assay
VISTA	PE	B7H5DS8	Thermo Scientific	12-1088-42	Stromal NK In tumor and PBMC

## Sheet: Sheet2
	Antigen	Conjugation	Clone	Company	Catalog number	Panel(s)
	CD3	PerCP-Cy5.5	UCHT1	Biolegend	300430	Stromal NK In tumor, NK phenotyping in PBMC
	CD8a	PerCP-Cy5.5	RPA-T8	Biolegend	301032	Stromal NK In tumor
	CD45	BV650	HI30	Biolegend	304043	Cell Sorting, Stromal NK in tumor
	CD56	PE-Cy7	HCD56	Biolegend	318317	tumor co-culture
	CD56	BV570	HCD56	Biolegend	318329	Stromal NK in tumor
	CD63	FITC	MEM-259	Immune tools	21270631	Exocytosis
	CD73	PE	AD2	Biolegend	344003	Stromal NK in tumor
	CD73	Pacific Blue	AD2	Biolegend	344011	Stromal NK In tumor
	CD73	APC-Cy7	AD2	Biolegend	344021	Cell Sorting
	CD107a	PerCP-Cy5.5	H4A3	Biolegend	328615	Exocytosis
	IFNγ	APC	B27	Biolegend	506510	Suppression Assay
	IL-10	PE	JES3-9D7	Biolegend	501403	IL10 and TGF-β production
	LAG-3	Alexa Fluor-488	11c3c65	Biolegend	369325	Stromal NK In tumor and PBMC
	NKG2C	Alexa Fluor-488	134591	R&D Systems	fab138g	Stromal NK in tumor
	NKG2D	PE-CF594	1D11	BD biosciences	562498	Stromal NK In tumor and PBMC
	NKp44	PE	p44-8 1	BD biosciences	558563	Stromal NK in tumor
	NKp46	PE-Cy7	900	BD biosciences	562101	Stromal NK in tumor
	PD1	APC	MIH4	Thermo Scientific	17-9969-41	Stromal NK In tumor and PBMC
	PD-L1	BV785	29E.2A3	Biolegend	329735	Stromal NK In tumor
	PD-L1	PE-Cy7	MIH1	BD biosciences	558017	Stromal NK In tumor and PBMC
	TGF-β	PE	1D11	R&D Systems	IC1835P	IL10 and TGF-β production
	TIGIT	APC	MBSA43	Thermo Scientific	17950042	Stromal NK in tumor
	TIM-3	BV785	F38-2E2	Biolegend	345032	Stromal NK In tumor and PBMC
	TNFα	BV785	mab11	Biolegend	502947	Suppression Assay
	VISTA	PE	B7H5DS8	Thermo Scientific	12-1088-42	Stromal NK In tumor and PBMC
	AQUA LIVE/DEAD			Thermo Scientific	L34957	Cell Sorting, NK phenotyping in PBMC,exocytosis
	Cell Trace Violet			Thermo Scientific	C34557	Suppression Assay
	CFSE			Biolegend	423801	Suppression Assay
	Near-IR LIVE/DEAD			Thermo Scientific	L10119	Suppression Assay, Stromal NK in tumor
